# Supplementary material for: Oncological outcomes of laparoscopic radical hysterectomy versus radical abdominal hysterectomy in patients with early-stage cervical cancer: a multicenter analysis
Source: HighWire-hosted journal article supplement (doi:10.1136/ijgc-2020-002086), 2021-01-27
Supplement: ijgc-2020-002086supp001_data_supplement.pdf [file ijgc-2020-002086supp001_data_supplement.pdf]

1 Supplementary material

2

**Preoperative tumor size  $\leq$  2 cms**

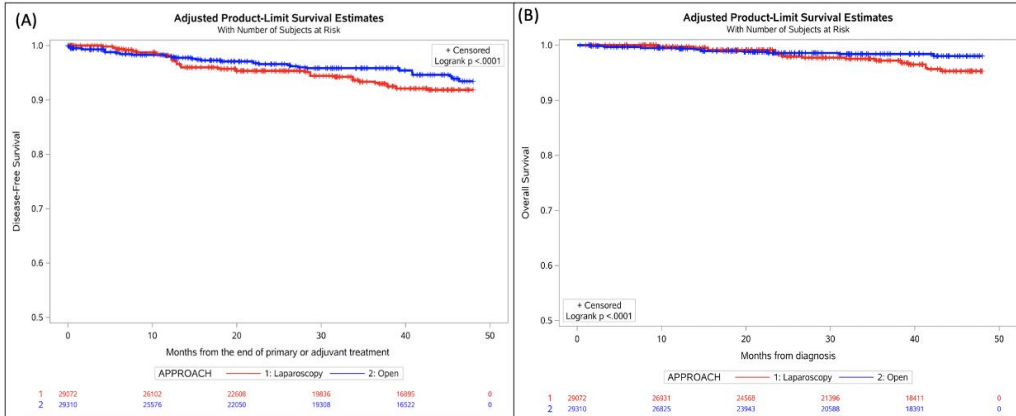

3

**Preoperative tumor size > 2 cms**

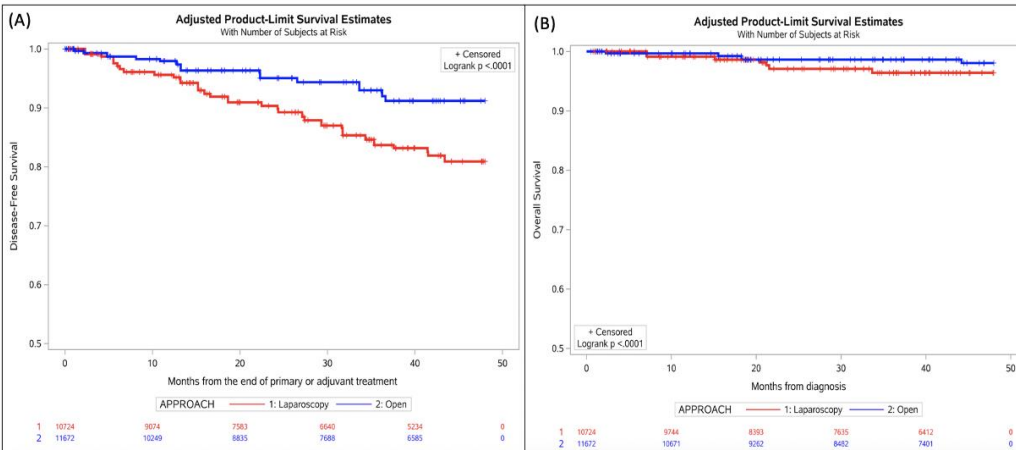

4

5

6

7

8

9

10

11

12

13

Figure S1. Inverse Probability of Treatment-Weighted Survival Curves according to surgical approach for tumor size and postconization residual disease (A) Disease-Free Survival. (B) Overall survival.

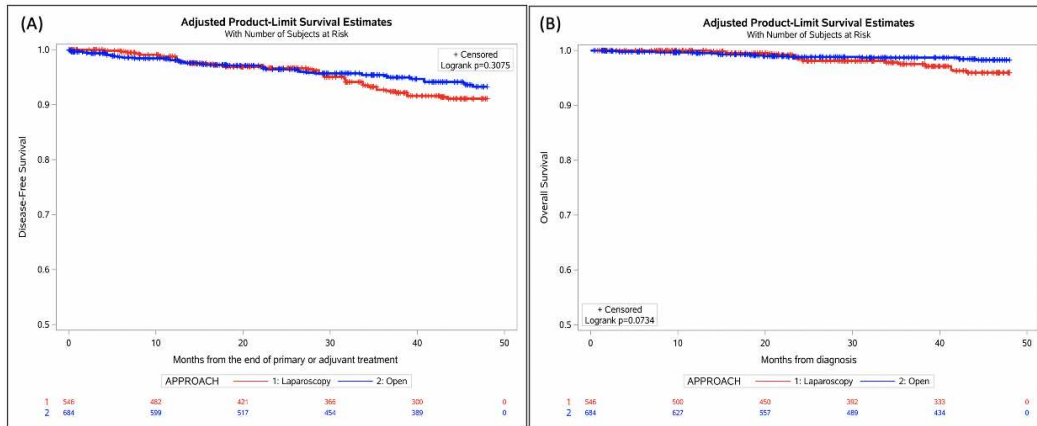

1  
2  
3  
4  
5  
6  
7  
8  
9  
10  
11  
12  
13  
14  
15  
16  
17  
18  
19  
20  
21  
22  
23  
24  
25  
26  
27  
28  
29  
30  
31  
32  
33  
34  
35  
36  
37

Figure S2. Inverse Probability of Treatment-Weighted Survival Curves according to surgical approach, including centers with more than 10 cases/year. (A) Disease-Free Survival. (B) Overall survival.

**Preoperative tumor size ≤ 2 cms**

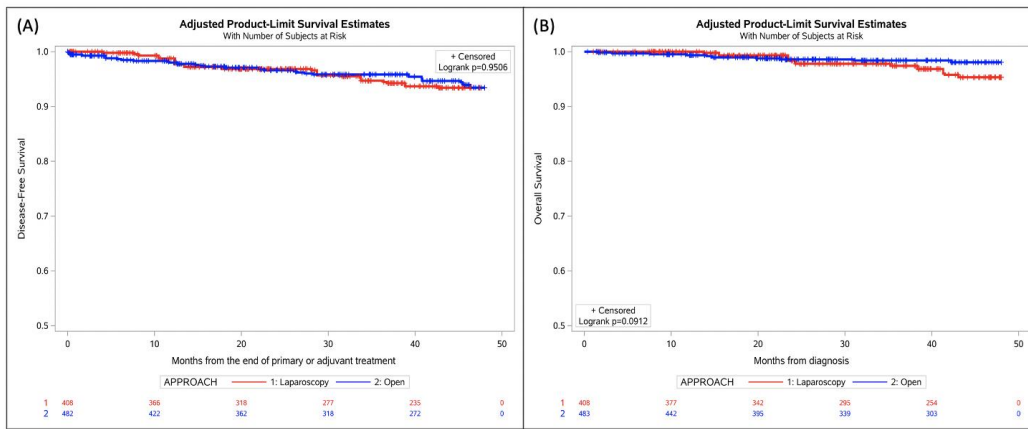

1

**Preoperative tumor size > 2 cms**

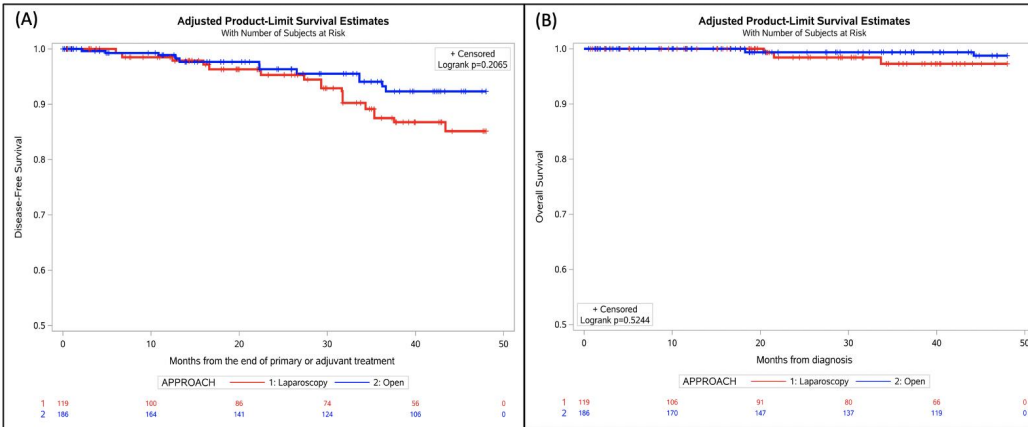

2  
3  
4  
5  
6  
7  
8  
9  
10  
11  
12  
13  
14  
15  
16

Figure S3. Inverse Probability of Treatment–Weighted Survival Curves according to surgical approach for tumor size, including centers with more than 10 cases/year. (A) Disease-Free Survival. (B) Overall survival.

| Institution                                          | Laparoscopy<br>n | Laparotomy<br>n | Cases<br>n (%)     | Number of<br>procedures/years |
|------------------------------------------------------|------------------|-----------------|--------------------|-------------------------------|
| Instituto Nacional de Enfermedades Neoplasicas, Perú | 142              | 242             | 384(27.7%)         | 32.0                          |
| Instituto Nacional de Cancerologia (INCAN), México   | 35               | 218             | 253(18.3%)         | 21.1                          |
| Instituto Nacional de Cancerologia, Colombia         | 118              | 128             | 246(17.8%)         | 20.5                          |
| Instituto de Cancerologia Las Americas, Colombia     | 179              | 53              | 232(16.8%)         | 19.3                          |
| Foundazione IRCCS Istituto Nazionale Tumori, Italia  | 82               | 43              | 125(9.0%)          | 10.4                          |
| Hospital Universitario La Paz, España                | 79               | 8               | 87(6.3%)           | 7.3                           |
| Hospital Italiano de Buenos Aires, Argentina         | 53               | 5               | 58(4.2%)           | 4.8                           |
| <b>Total</b>                                         | <b>688</b>       | <b>697</b>      | <b>1385 (100%)</b> | <b>16.48</b>                  |

Table S1. Number of procedures by approach in each institution.

1  
2  
3  
4  
5  
6  
7  
8  
9  
10  
11  
12  
13  
14  
15  
16  
17  
18  
19  
20  
21  
22  
23  
24  
25  
26  
27  
28  
29  
30  
31  
32  
33  
34  
35

| Institution                                          | Laparoscopy<br>n(%) | Laparotomy<br>n(%) | Total<br>n (%)   |
|------------------------------------------------------|---------------------|--------------------|------------------|
| Instituto Nacional de Enfermedades Neoplasicas, Perú | 3(3.1)              | 2(2.0)             | 5(5.1)           |
| Instituto Nacional de Cancerologia (INCAN), México   | 1(1.0)              | 16(16.3)           | 17(17.3)         |
| Instituto Nacional de Cancerologia, Colombia         | 11(11.2)            | 10(10.2)           | 21(21.4)         |
| Instituto de Cancerologia Las Americas, Colombia     | 9(9.2)              | 2(2.0)             | 11(11.2)         |
| Foundazione IRCCS Istituto Nazionale Tumori, Italia  | 10(10.2)            | 3(3.1)             | 13(13.3)         |
| Hospital Universitario La Paz, España                | 21(21.4)            | 2(2.0)             | 23(23.4)         |
| Hospital Italiano de Buenos Aires, Argentina         | 8(8.2)              | 0(0.0)             | 8(8.2)           |
| <b>Total</b>                                         | <b>63(64.3)</b>     | <b>35(35.7)</b>    | <b>98(100.0)</b> |

Table S2. Rate of recurrence in the centers (n=98)

1  
2  
3  
4  
5  
6  
7  
8  
9  
10

1  
2  
3  
4

| Study                   | Stage                   | N after matching                                         | Median follow-up (months) | OS (LRH/MIS vs ARH)                                                                                                                                                             | DFS or PFS or RFS (LRH/MIS vs ARH)                                                                                                                                                  |
|-------------------------|-------------------------|----------------------------------------------------------|---------------------------|---------------------------------------------------------------------------------------------------------------------------------------------------------------------------------|-------------------------------------------------------------------------------------------------------------------------------------------------------------------------------------|
| Melamed et al, 2018 [6] | IA2- IB1                | 1334 MIS/<br>1340 ARH                                    | 45.0                      | HR 1.65 [95% CI 1.22-2.22]*<br>All-cause mortality:<br><2 cm: HR 1.46 [95% CI 0.70-3.02]<br><br>≥2 cm: HR 1.66 [95% CI 1.19-2.30]                                               | NI                                                                                                                                                                                  |
| Paik et al, 2019 [9]    | IB-IIA                  | 119 LRH/<br>357 ARH<br><br>< 2 cm:<br>62 LRH/186 ARH     | 63.9<br><br>69.1          | HR 0.592 [95% CI 0.071-4.922]<br><br>HR not calculated                                                                                                                          | DFS HR 2.738 [95% CI 1.326-5.650]*<br><br>DFS HR 12.987 [95% CI 1.451-116.244]*                                                                                                     |
| Kim SI et al, 2019 [11] | IB1-IB2<br><br>IB1      | 222 LRH/<br>343 ARH<br><br>≤2 cm:<br>122 LRH/<br>161 ARH | 59.1<br><br>66.2          | 5-y OS 96.9% vs. 94.6%<br><br>5-y OS 96.4% vs. 98.6%                                                                                                                            | 3-y PFS: 85.4% vs. 91.8%*<br><br>3-y PFS: 93.1% vs. 90.0%                                                                                                                           |
| Uppal et al, 2020 [12]  | IA1 with LVSI, IA2, IB1 | 156 LRH/<br>159 ARH<br><br>≤2 cm: 264                    | 30.7 LRH vs 44.6 ARH      | HR 0.60 [95% CI, 0.19-1.85]                                                                                                                                                     | RFS HR 2.83 [95% CI, 1.10-7.18]*<br><br>aHR 6.31 [95% CI, 1.24 to 31.9]*                                                                                                            |
| Hu et al, 2020 [17]     | IA2, IB1, IIA1          | 406 LRH/<br>406 ARH<br><br><2 cm:<br>147 LRH/<br>147 ARH | 60 (3-82)                 | HR 1.60 [95% CI 0.89-2.88]<br><br>HR 0.59 [95% CI 0.11-3.13]                                                                                                                    | HR 1.65 [95% CI 1.00-2.73]*<br><br>HR 0.71 [95% CI 0.24- 2.16]                                                                                                                      |
| Chen B et al, 2020 [19] | IA1 with LVSI- IIA2     | 879 RRH/<br>879 ARH<br><br>≤2 cm: 982                    | 24 RRH vs 48 ARH          | HR 2.862 [95% CI 1.59-5.16*]<br><br>HR 1.688 [95% CI 0.423-6.734]                                                                                                               | HR 2.34 [95% CI 1.54-3.56]*<br><br>HR 1.267 [95%CI 0.518-3.098]                                                                                                                     |
| Guo et al, 2020 [20]    | IA1 with LVSI- IIA1     | 2439 MIS/<br>813 ARH                                     | 90 (18-162)               | All cohort<br>2-y HR 0.99 [95% CI 0.70-1.41]<br>5-y HR 1.20 [95% CI 0.79-1.83]<br><br>IB1 Cohort<br>2-y RFS HR 1.87 [95% CI 1.03-3.40]*<br>5-y RFS HR, 2.57 [95% CI 1.29-5.10]* | All cohort<br>2-y RFS HR 1.04 [95% CI 0.76-1.42]<br>5-y RFS 1.12 [95% CI 0.76-1.65]<br><br>IB1 Cohort<br>2-y RFS HR 1.81 [95% CI 1.09-3.0]*<br>5-y RFS HR, 2.17 [95% CI 1.21-3.89]* |
| Chiva et al, 2020 [21]  | IB1                     | 291 MIS/<br>407 ARH                                      | 58 (0-83)                 | HR 2.45 [95% CI, 1.30-4.60]*                                                                                                                                                    | HR 2.07; [95% CI, 1.35-3.15]*                                                                                                                                                       |
| Rodriguez et al, 2020   | IA1 with LVSI, IA2, IB1 | 681 LRH/<br>698 ARH                                      | 52.1 LRH vs 52.6 ARH      | 4-y OS HR 2.04 [95%CI 1.00-4.16]<br><br>After adjustment for adjuvant treatment<br>4-y OS HR 2.14 [95% IC 1.05-4.37]*                                                           | 4-y DFS HR 1.64 [95% CI 1.09-2.46]*<br><br>After adjustment for adjuvant treatment<br>4-y DFS HR 1.7 [95% CI 1.13-2.56]*                                                            |

5 OS= Overall survival; DFS= Disease-free survival; PFS= Progression-free survival; RFS= Recurrence-free survival; LRH= Laparoscopic radical hysterectomy; MIS= Minimally invasive surgery; ARH= Abdominal radical hysterectomy; RRH= Robotic radical hysterectomy; LVSI= Lymphovascular invasion; y=year; NI= Not information  
6  
7  
8 \*p-value< 0.05  
9

- 1 Table S3. Retrospective studies in which propensity score method was used for
- 2 analysis.
- 3
- 4
